# Supplementary material for: sRNAdeep: a novel tool for bacterial sRNA prediction based on DistilBERT encoding mode and deep learning algorithms
Source: PubMed Central journal article supplement (PMC11526673; doi:10.1186/s12864-024-10951-6), 2024-10-31

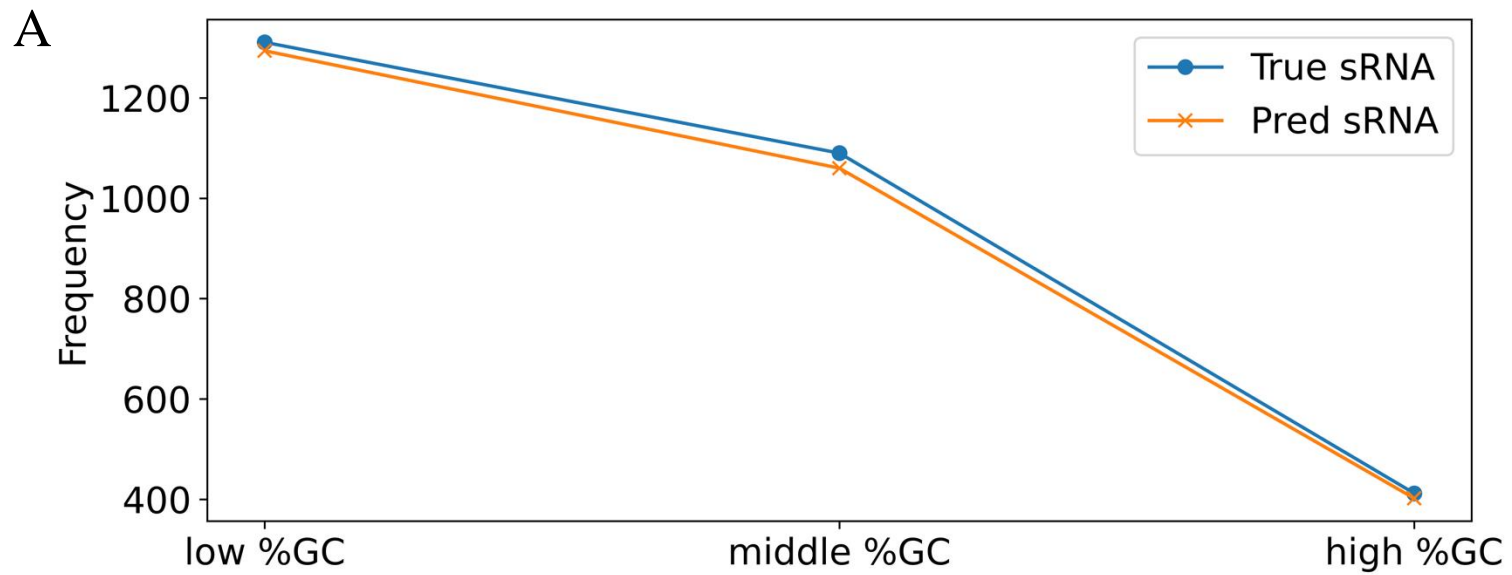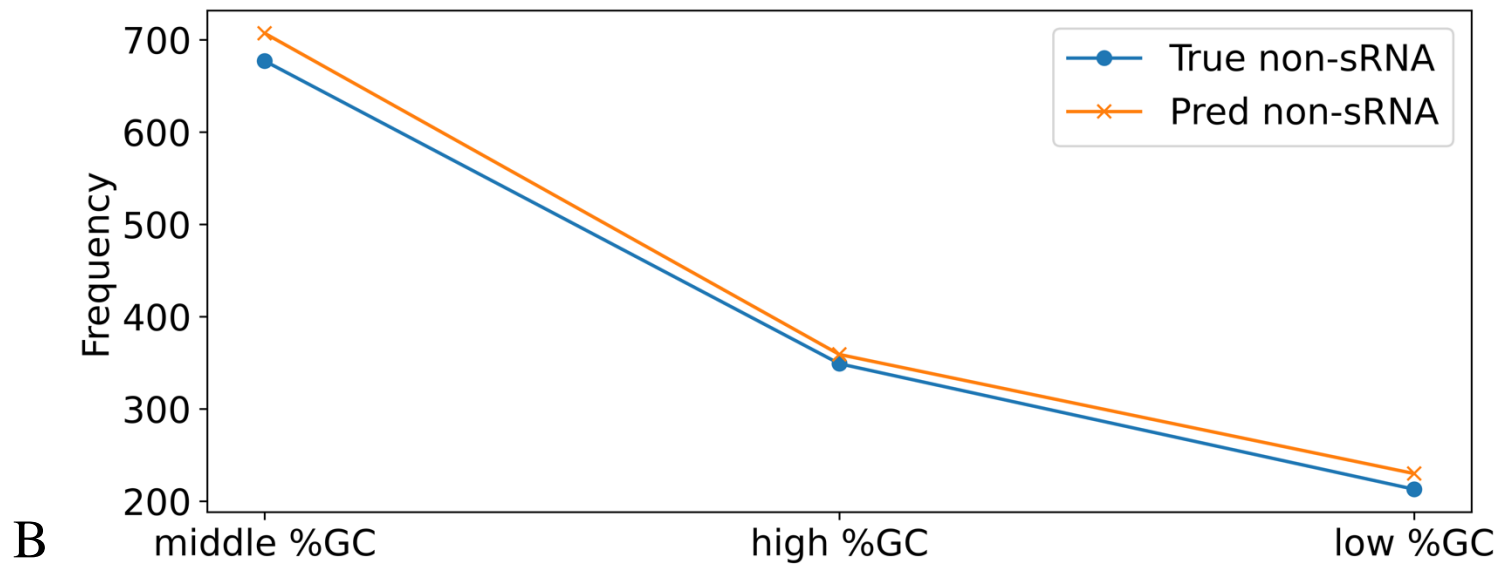

Supplement: 12864_2024_10951_MOESM1_ESM.pdf [file 12864_2024_10951_MOESM1_ESM.pdf]
